tomography during a slow inflation maneuver in experimental models of lung injury. *Crit Care Med* 2008; 36:903–9

104. Williams K, Hinojosa-Kurtzberg M, Parthasarathy S: Control of breathing during mechanical ventilation: Who is the boss? *Respir Care* 2011; 56:127–39
105. Vaschetto R, Cammarota G, Colombo D, Longhini F, Grossi F, Giovanniello A, Della Corte F, Navalesi P: Effects of propofol on patient-ventilator synchrony and interaction during pressure support ventilation and neurally adjusted ventilatory assist. *Crit Care Med* 2014; 42:74–82

## ANESTHESIOLOGY REFLECTIONS FROM THE WOOD LIBRARY-MUSEUM

### Pure Nitrous Oxide and Possibly Phthisis from Dr. J. K. Carmichael

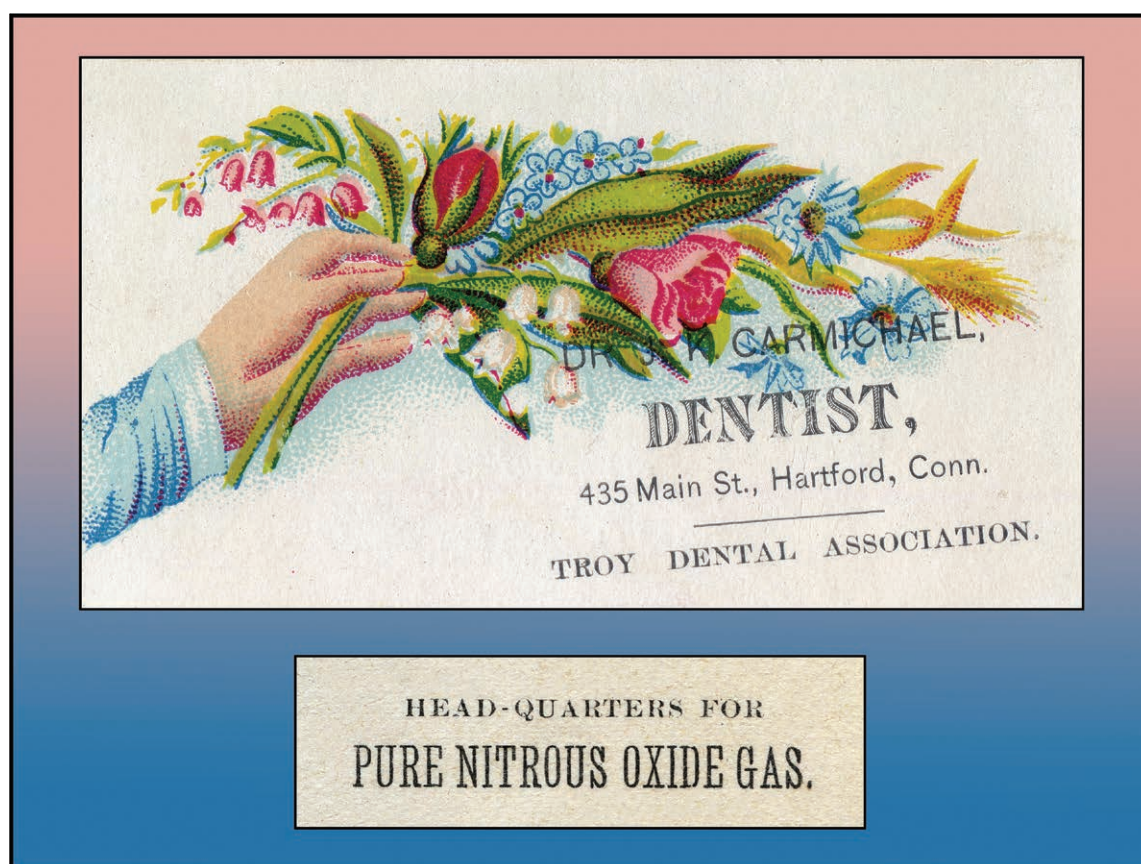

Brother of a horseman, James K. Carmichael (1864 to 1894) was raised in Rensselaer County, New York. After studying dentistry, he set up practice in Hartford, Connecticut. There he met the daughter of a harness maker, his future wife Jennie Pearl. Dr. Carmichael issued this trade card (*top*) from his Main Street “head-quarters for pure nitrous oxide gas” (*bottom*). A few years after his 1888 marriage, his pulmonary tuberculosis became so severe that a Dr. Pease had to cover the office. While battling “phthisis” at a health resort in Colebrook, New Hampshire, 29-yr-old Dr. Carmichael died. Back in the 1880s, many dentists gauged the quality of their laughing gas by breathing it from the mouthpiece or mask. We can only speculate whether patients may have contracted “consumption” from Dr. Carmichael. (Copyright © the American Society of Anesthesiologists’ Wood Library-Museum of Anesthesiology.)

*George S. Bause, M.D., M.P.H., Honorary Curator and Laureate of the History of Anesthesia, Wood Library-Museum of Anesthesiology, Schaumburg, Illinois, and Clinical Associate Professor, Case Western Reserve University, Cleveland, Ohio. UJYC@aol.com.*
